# Supplementary material
Source: Springer Nature journal article supplement (https://www.springermedizin.de/resource/supplementary/12936_2014_3366_MOESM1_ESM.pdf/9545740)
Supplement: MOESM1 [file 9545740]

Additional file 1: Efficiencies and sequences of the forward (F) and reverse (R) primers.

| Accession number | New accession number | Name                                                       | Forward (F) and reverse (R) Primers                                  | R <sup>2</sup> | Slope | Efficiency | Concentration |
|------------------|----------------------|------------------------------------------------------------|----------------------------------------------------------------------|----------------|-------|------------|---------------|
| PF11_0507        | PF3D7_1149000        | Antigen 332. DBL-like protein (Pf332)                      | F-GGGTCTTGGTATATAAGCATTCTTTGA<br>R-TCCCCGTACCATGAACACG               | 0.99           | -3.44 | 95.12      | 0.5 μM        |
| PF10775w         | PF3D7_0915800        | Glycolipid transfer protein                                | F-TGTGCACAAGAAGCATATAATGAAGTATTA<br>R-AAGTACAGTGAAGCTTGTGATGAG       | 0.98           | -3.33 | 99.57      |               |
| PFE0475w         | PF3D7_0509600        | Asparagine-tRNA ligase                                     | F-ATCAATTACCCAACATATAAAACCATT<br>R-CTCTTCCGACCTCCTACAAC              | 0.99           | -3.40 | 96.80      |               |
| MAL7P1.5         | PF3D7_0701600        | Pfmc-2TM Maurer's cleft two transmembrane protein (MC-2TM) | F-CAACCTTATTACATCTTTACTCTGCATTTA<br>R-AAACCTATTTTCATGTCAGGAAAATAACT  | 0.99           | -3.42 | 95.84      |               |
| PFL2065c         | PF3D7_1242900        | Mitochondrial import inner membrane translocase subunit    | F-AAATTGGACCAAAAATTAAGTTCAAGTG<br>R-TCTGTTCCAAGCGCTGATTTAAG          | 0.99           | -3.32 | 100.15     |               |
| PFF1555w         | PF3D7_0632000        | Rifin (RIF)                                                | F-TATTGGAATCGGTTTTACTGCAC<br>R-AATGGCGAACAAATCACAGGT                 | 0.99           | -3.44 | 95.37      |               |
| PFC0305w         | PF3D7_0307300        | EB1 homolog                                                | F-AAGATGATGAATCTATGGAACCTAACAAT<br>R-CAGTAGGTGGCGTAGTCTATCGAAC       | 0.98           | -3.29 | 101.45     | 0.9 μM        |
| PF11_0014        | PF3D7_1100800        | Pfmc-2TM Maurer's cleft two transmembrane protein (MC-2TM) | F-TTGTGGGTTTAATTGAAGCATCTTCT<br>R-ACATAAAAACCTGGAAAAATACATAGAGGATAAG | 1.00           | -3.38 | 97.77      |               |
| PFC0640w         | PF3D7_0315200        | Circumsporozoite- and TRAP-related protein (CTRP)          | F-GGAATTATGCGTTTTCGCCAAAT<br>R-GATGGGTAGCACCACCATATCC                | 0.99           | -3.36 | 98.38      |               |
| PF14_0749        | PF3D7_1477800        | Acyl-CoA binding protein (ACBP)                            | F-AGAACTATAAATTTGCCCAATGAACTTAA<br>R-TTATGTGCGCTTGGTTCCTT            | 1.00           | -3.34 | 99.12      |               |
| PFE0140c         | PF3D7_0502900        | Mitochondrial inner membrane TIM10 associated protein      | F-AGAAGTTTTCTGAACAAATGGGAAA<br>R-TGTGGACGCCTTGGTTACAA                | 0.99           | -3.40 | 96.71      |               |
| PF13_0010        | PF3D7_1301200        | Glycophorin binding protein (GBPH2)                        | F-GAGACAAATACCAACAAGATGCAGATT<br>R-TGCGCACATTCCTTAATGAAG             | 0.98           | -3.41 | 96.45      |               |

For each probe, the new and old accession numbers, the name and acid nucleic sequences are given. R<sup>2</sup>, slope and efficiency were calculated to choose the best concentration to use for the qRT-PCR experiment.
